# Supplementary material for: A direct one-step synthesis of a smart graphene/silica nanocomposite and its application for improving the acid resistance and corrosion resistance properties of waterborne epoxy coatings
Source: Royal Society of Chemistry journal article supplement (doi:10.1039/d4ra00522h), 2024-01-01
Supplement: d4ra00522h1.pdf [file d4ra00522h1.pdf]

## **Supporting information**

**A one-step building of smart graphene/silica nanocomposite and its use for anticorrosion in waterborne coating**

**Table S1.** Formula of BTA@SN-GO with different R-GO or BTA amount

| Experiment number | TEOS amount | R-rGO amount | BTA amount | CTAB amount |
|-------------------|-------------|--------------|------------|-------------|
| 1                 | 7g          | 1g           | 2.5g       | 1.5g        |
| 2                 | 7g          | 6g           | 2.5g       | 1.5g        |
| 3                 | 7g          | 10g          | 2.5g       | 1.5g        |
| 4                 | 7g          | 15g          | 2.5g       | 1.5g        |
| 5                 | 7g          | 100g         | 2.5g       | 1.5g        |
| 6                 | 7g          | 10g          | 0.25g      | 1.5g        |
| 7                 | 7g          | 10g          | 0.5g       | 1.5g        |
| 8                 | 7g          | 10g          | 1g         | 1.5g        |
| 9                 | 7g          | 10g          | 5g         | 1.5g        |

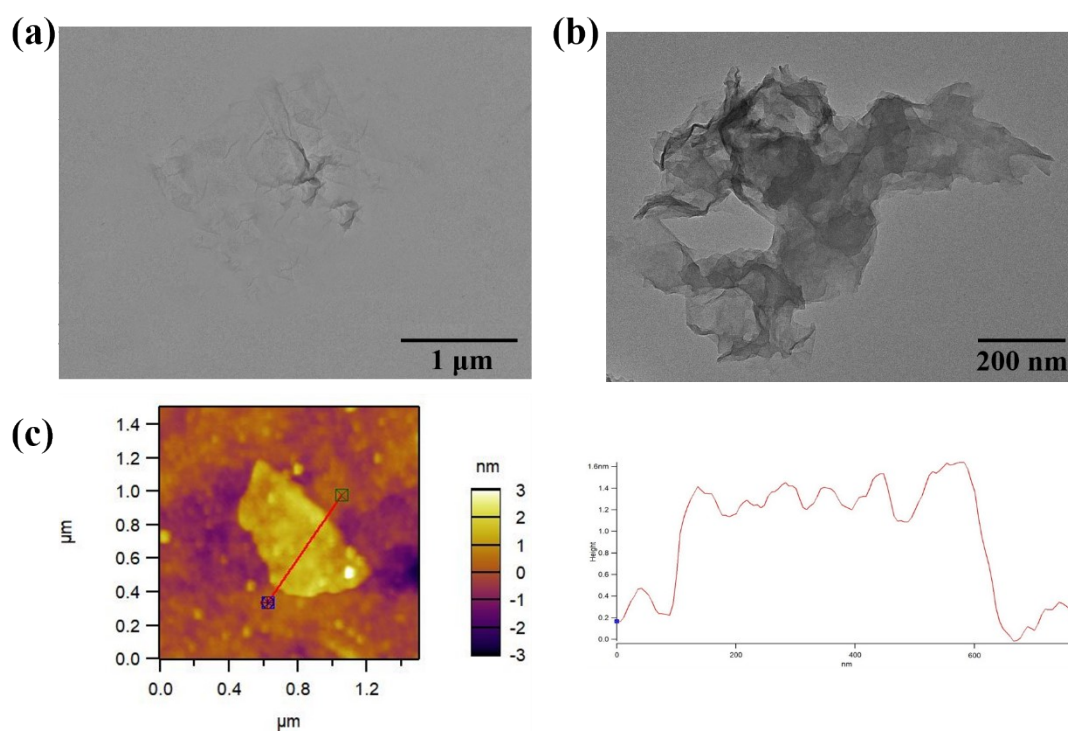

**Figure S1.** TEM images of GO (a) and H-rGO (b); AFM images and height profiles of GO (c).

**Table S2.** Zeta potential of GO and R-rGO

|                | GO       | R-rGO    |
|----------------|----------|----------|
| Zeta potential | -33.3 mV | -46.1 mV |

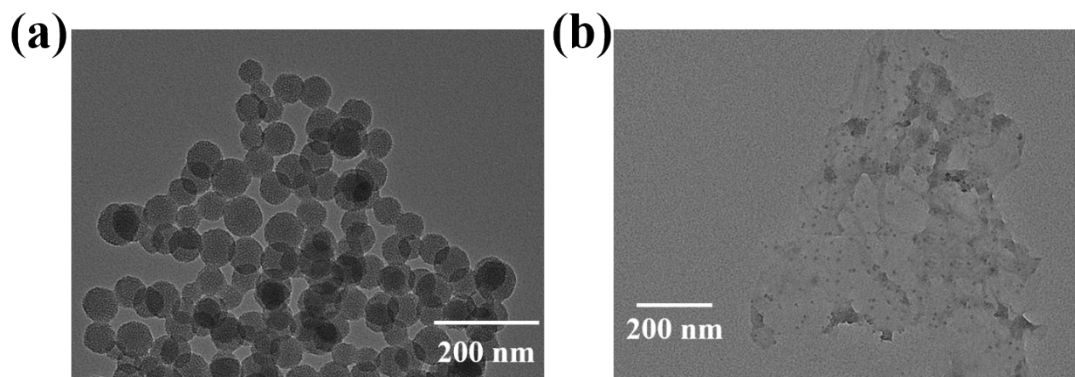

**Figure S2.** TEM image of SN (a) and SN-rGO (b) nanoparticles.

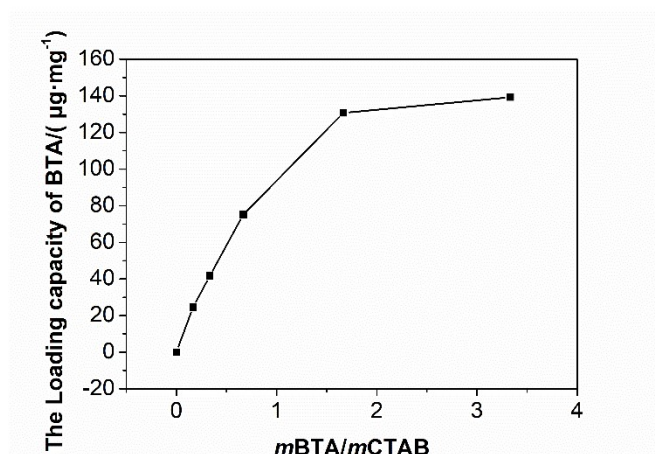

**Figure S3.** The loading capacity of BTA of BTA@SN as the functions of the mass ratios of BTA to CTAB in reactants.

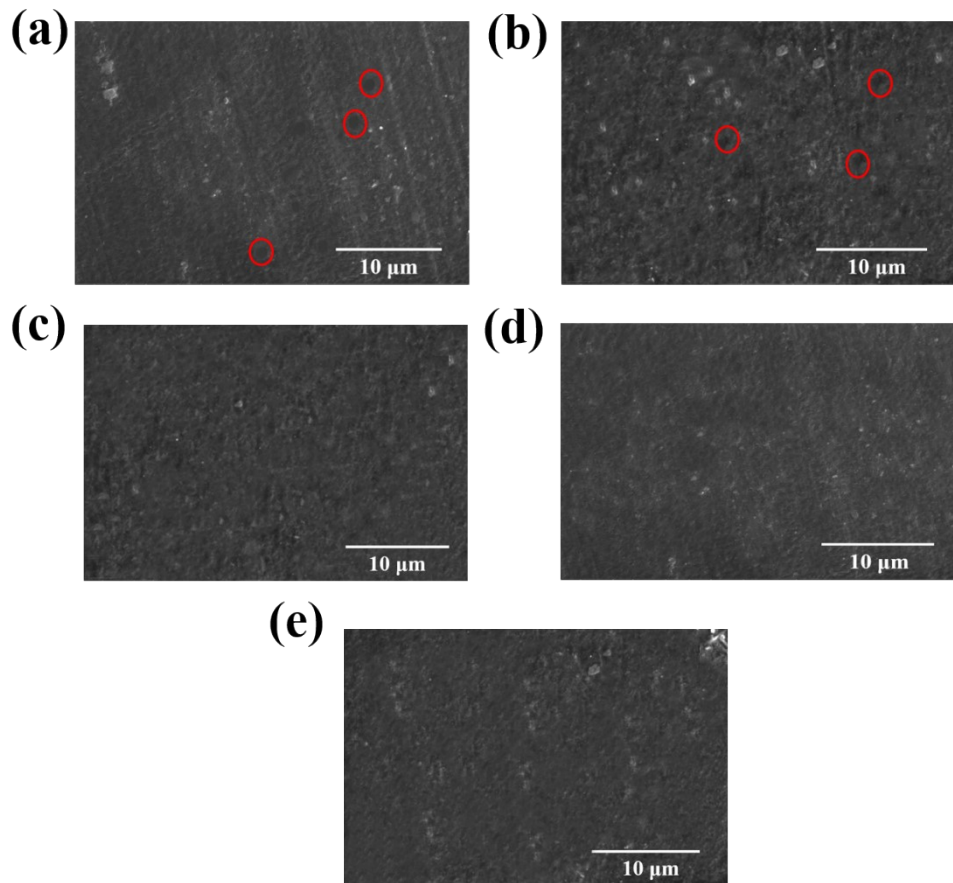

**Figure S4.** SEM images of coatings. (a) BPc (b) SPc (c) SGPc (d) SrGPc (e) SrGIAC

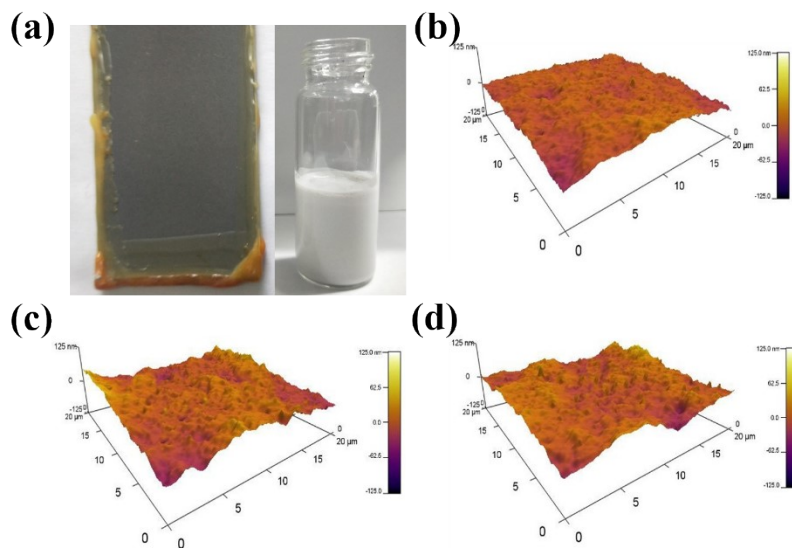

**Figure S5.** SEM images of coatings. (a) BPc (b) SPc (c) SGPc (d) SrGPc (e) SrGIAC

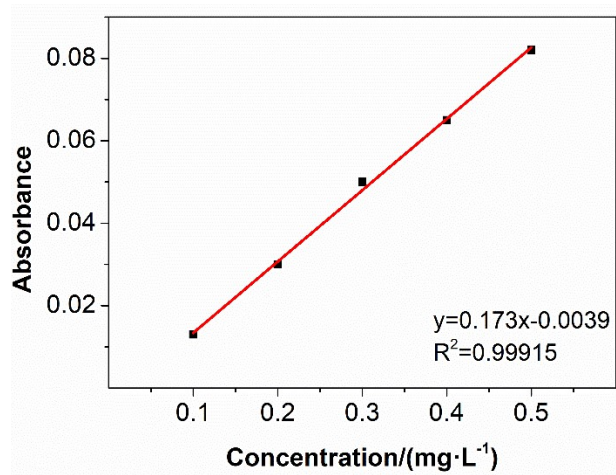

**Figure S6.** Standard curve of ferric ions.

**Table S3.** Absorbance value with different immersion time

| Sample              | Time | Abs.  |
|---------------------|------|-------|
| <b>BPc</b>          | 1h   | 0.016 |
|                     | 24h  | 0.024 |
|                     | 48h  | 0.038 |
|                     | 72h  | 0.052 |
|                     | 96h  | 0.063 |
| <b>(B+SN-rGO)Pc</b> | 1h   | 0.014 |
|                     | 24h  | 0.017 |
|                     | 48h  | 0.026 |
|                     | 72h  | 0.037 |
|                     | 96h  | 0.053 |
| <b>(B@S+rG)Pc.</b>  | 1h   | 0.018 |
|                     | 24h  | 0.023 |
|                     | 48h  | 0.034 |
|                     | 72h  | 0.046 |
|                     | 96h  | 0.061 |
| <b>SrGIAc-0.25</b>  | 1h   | 0.013 |
|                     | 24h  | 0.014 |
|                     | 48h  | 0.019 |
|                     | 72h  | 0.023 |
|                     | 96h  | 0.030 |

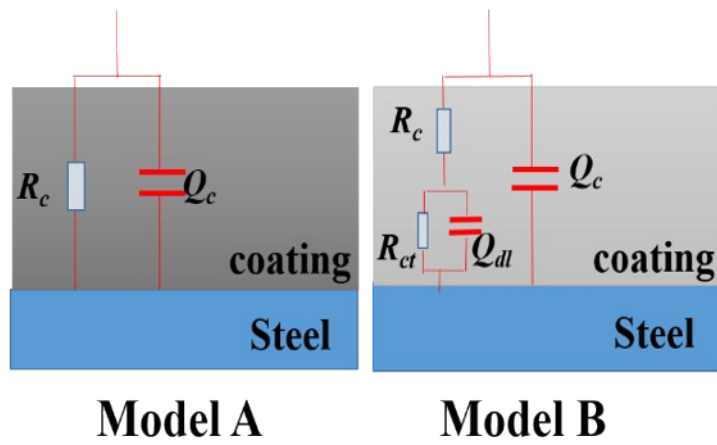

**Figure S7.** Equivalent electrical circuits used to fit EIS results.
